# Supplementary material
Source: ML conference proceedings conference paper supplement (https://openaccess.thecvf.com/content/ICCV2021/html/Wang_Continual_Learning_for_ICCV_2021_paper.html)
Supplement: Supplementary file 1 [file Wang_Continual_Learning_for_ICCV_2021_supplemental.pdf]

# Continual Learning for Image-Based Camera Localization

## – Supplementary material –

---

**Algorithm 1** Reservoir

---

- 1:  $N \leftarrow$  number of all instances observed
  - 2:  $s \sim \text{Random}(0, 1) \times N$
  - 3: **if**  $s < |B|$  **then**
  - 4:   Replace a random instance in  $B$  with  $(x, \mathbf{y})$
  - 5: **else**
  - 6:   Ignore
  - 7: **end if**
- 

---

**Algorithm 2** Class-balance

---

- 1: **if**  $c$  is not largest **then**
  - 2:   Select a random instance of largest class
  - 3:   Replace it with  $(x, \mathbf{y})$
  - 4: **else**
  - 5:    $m_c \leftarrow$  number of currently stored instances of  $c$
  - 6:    $n_c \leftarrow$  number of total instances observed of  $c$
  - 7:    $u \sim \text{Random}(0, 1)$
  - 8:   **if**  $u < m_c/n_c$  **then**
  - 9:     Replace an instance of  $\text{class}(x)$  with  $(x, \mathbf{y})$
  - 10:   **else**
  - 11:     Ignore
  - 12:   **end if**
  - 13: **end if**
- 

### 1. Baseline Algorithms

As mentioned in our main paper, the baseline algorithms *Reservoir* [4] and *Class-balance* [1] are presented in Algorithm 1 and 2 respectively.

### 2. Training Details

For continual learning training purposes, we adopt two *dataloaders*, namely *trainloader* and *bufferloader*, in our training procedure except the first scene training. *Trainloader* randomly loads data from the current scene and generates ground truth labels to feed to the model. While in *bufferloader*, the training frames are loaded from our buffer and ground truth labels are either generated the same as in *trainloader* or extracted from intermediate representations. The loaded image pairs  $\langle t_i, b_i \rangle$  are fed to the training

network separately and their losses are summed together as the final loss term as shown in Eq 3 (c.f. Sec.3.1) in the main paper, where  $i$  indicates the  $i^{\text{th}}$  training step.

**Rep-buff.** Since we have two classification layers and one regression layer in our training model, the loss terms in Eq 4 (c.f. Sec.3.2) can be written as:

$$L_t = \alpha_1 \cdot e_{l1} + \alpha_2 \cdot e_{l2} + \beta \cdot e_{3D} \quad (1)$$

Where  $e_l$  is the classification loss and  $e_{3D}$  is the summed regression loss for each pixel. The weighting coefficients are set to (1,1,100000) during the training. However, in our *Rep-buff*, the real-value prediction for regression layer  $\tilde{y}_{3D}$  might be unbounded, and could give highly erroneous guidance to the loss term  $e_{3D}$  [3]. Hence, instead of directly minimizing  $\hat{y}_{3D}$  w.r.t.  $\tilde{y}_{3D}$ , as with [3], the  $\tilde{y}_{3D}$  is applied as an upper bound. That is, the prediction  $\hat{y}_{3D}$  is made as close as possible to the ground truth and not penalized if its performance surpasses  $\tilde{y}_{3D}$ , we have the  $\beta$  in Eq 1 for *Rep-buff*:

$$\beta = \begin{cases} 100000, & \text{if } \left\| \hat{y}_{3D} - y_{3D} \right\|^2 > \left\| \tilde{y}_{3D} - y_{3D} \right\|^2. \\ 0, & \text{otherwise} \end{cases} \quad (2)$$

**Benefits of  $y_1$  over  $y_{3D}$ .** As mentioned in our main paper, dense 3D points  $y_{3D}$  provide an accurate estimate of coverage score. However, it is computationally intensive when considering all the pixels in a candidate image. Thus, only the hierarchical cluster labels are selected to represent the dense 3D points. We have 25 labels for each level and in total 625 labels for an individual scene. In our combined scenes **i7S**, **i12S**, and **i19S**, we combine the labels tree at the first level as in [2]. That is, for **i19S**, the first level contains 475 branches.  $625 \div$  Average number of 3D points per scene is the reduced computations in such a setting.

### 3. Disorder Scenes

At this point, we provide the results for **i7S** where models are trained with three different permutations of scenes, with buffer size  $B = 256$  and *Img-buff* replay. Note that we preserve the order of the last scene. Table 1 present the accuracy on the test images of individual scenes and overall

| Scene          | Accuracy (%) |               |                |
|----------------|--------------|---------------|----------------|
|                | Reservoir    | Class-balance | Buff-CS (ours) |
| Heads          | 78.60        | 89.20         | <b>90.90</b>   |
| Kitchen        | <b>47.52</b> | 46.84         | 37.18          |
| Pumpkin        | 43.65        | 38.60         | <b>55.50</b>   |
| Chess          | 93.40        | <b>96.10</b>  | 93.45          |
| Office         | <b>76.14</b> | 69.65         | 69.48          |
| Fire           | 86.30        | <b>93.50</b>  | 92.95          |
| Stairs         | 73.30        | <b>78.60</b>  | 76.10          |
| <b>Average</b> | 71.27        | 73.21         | <b>73.65</b>   |

| Scene          | Accuracy (%) |               |                |
|----------------|--------------|---------------|----------------|
|                | Reservoir    | Class-balance | Buff-CS (ours) |
| Office         | 58.85        | 56.78         | <b>60.43</b>   |
| Heads          | 73.60        | 89.40         | <b>89.60</b>   |
| Fire           | 79.10        | 81.05         | <b>84.00</b>   |
| Chess          | 88.40        | 85.80         | <b>93.65</b>   |
| Kitchen        | 48.82        | <b>50.34</b>  | 42.86          |
| Pumpkin        | 51.30        | <b>59.00</b>  | 54.25          |
| Stairs         | <b>80.60</b> | 76.40         | 80.10          |
| <b>Average</b> | 68.69        | 71.25         | <b>72.12</b>   |

| Scene          | Accuracy (%) |               |                |
|----------------|--------------|---------------|----------------|
|                | Reservoir    | Class-balance | Buff-CS (ours) |
| Heads          | 70.00        | 90.90         | <b>93.30</b>   |
| Office         | 61.10        | 60.93         | <b>63.58</b>   |
| Chess          | 88.40        | 86.40         | <b>93.85</b>   |
| Kitchen        | <b>47.08</b> | 42.56         | 40.25          |
| Fire           | 83.45        | 88.00         | <b>87.95</b>   |
| Pumpkin        | 51.65        | 47.95         | <b>53.55</b>   |
| Stairs         | 81.50        | <b>82.10</b>  | 81.30          |
| <b>Average</b> | 69.03        | 71.26         | <b>73.40</b>   |

Table 1: The accuracy on individual scenes of **i7S** with different training order after the training is complete. The order for the last scene is preserved. All methods employs an *Img-buff* buffer of size 256. The best results are highlighted in red.

accuracy on **i7S**. The results show that our method is not affected by the order of scenes and performs comparably to or exceeds the baselines as mentioned in the main paper.

#### 4. Rep-buff

In all our experiments the number of cluster levels used is  $L = 2$ . The corresponding network predictions at each cluster level,  $\hat{y}_1, \hat{y}_2$  and the final 3D coordinates  $y_{3D}$  are stored in *Rep-buff*. We analyze the influence of experience-replay using intermediate predictions  $\hat{y}_1, \hat{y}_2$  and the final layer predictions  $y_{3D}$  in this section.

The different layers are assigned weights,  $\alpha_1, \alpha_2, \beta$ . For

| Scenes           | Accuracy (%)    |                   |                 |
|------------------|-----------------|-------------------|-----------------|
|                  | Weights = 0,0,1 | Weights = 0,0,1e5 | Weights = 1,1,0 |
| apt1/kitchen     | 84.59           | 77.87             | 82.91           |
| apt1/living      | 77.28           | 74.65             | 79.11           |
| apt2/bed         | 85.29           | 78.92             | 80.88           |
| apt2/kitchen     | 96.19           | 95.71             | 97.62           |
| apt2/living      | 79.08           | 80.23             | 77.65           |
| apt2/luke        | 46.79           | 42.15             | 45.83           |
| office1/gates362 | 67.88           | 64.25             | 72.02           |
| office1/gates381 | 50.43           | 51.57             | 56.41           |
| office1/lounge   | 87.46           | 86.54             | 86.54           |
| office1/manolis  | 81.18           | 79.42             | 74.65           |
| office2/5a       | 94.16           | 94.77             | 93.96           |
| office2/5b       | 97.28           | 96.26             | 97.04           |
| <b>Average</b>   | 78.97           | 76.86             | 78.72           |

Table 2: The accuracy on individual scenes of **i12S** with buffer size  $B = 128$  and different assigned weights on *Rep-buff*.

$(\alpha_1, \alpha_2, \beta) = (1, 1, 0)$  and  $(0, 0, 1)$  respectively, results in table 2 show that both these conditions obtain comparable performance. For *Buff-CS*, the results are better than the weight distribution  $(1, 1, 100000)$  originally proposed by [2].

#### 5. Additional Results on i12S

Similar to the **i7S** results presented in the main paper, we show the results on individual scenes of **i12S** after training is completed in Table 3, and the average accuracy over different stages of the training process on each scene of **i12S** in Table 4. In addition, the accuracy on individual scenes of **i12S** at each stage of the training is provided in Fig. 1. The results show for majority of scenes *Buff-CS* outperforms *Class-balance* and *Reservoir* across different evaluation settings.

#### References

- [1] Aristotelis Chrysakis and Marie-Francine Moens. Online continual learning from imbalanced data. In *ICML*, 2020.
- [2] Xiaotian Li, Shuzhe Wang, Yi Zhao, Jakob Verbeek, and Juho Kannala. Hierarchical scene coordinate classification and regression for visual localization. In *CVPR*, 2020.
- [3] Muhamad Risqi U Saputra, Pedro PB de Gusmao, Yasin Al-malioglu, Andrew Markham, and Niki Trigoni. Distilling knowledge from a deep pose regressor network. In *ICCV*, 2019.
- [4] Jeffrey S Vitter. Random sampling with a reservoir. *ACM Transactions on Mathematical Software (TOMS)*, 11(1):37–57, 1985.

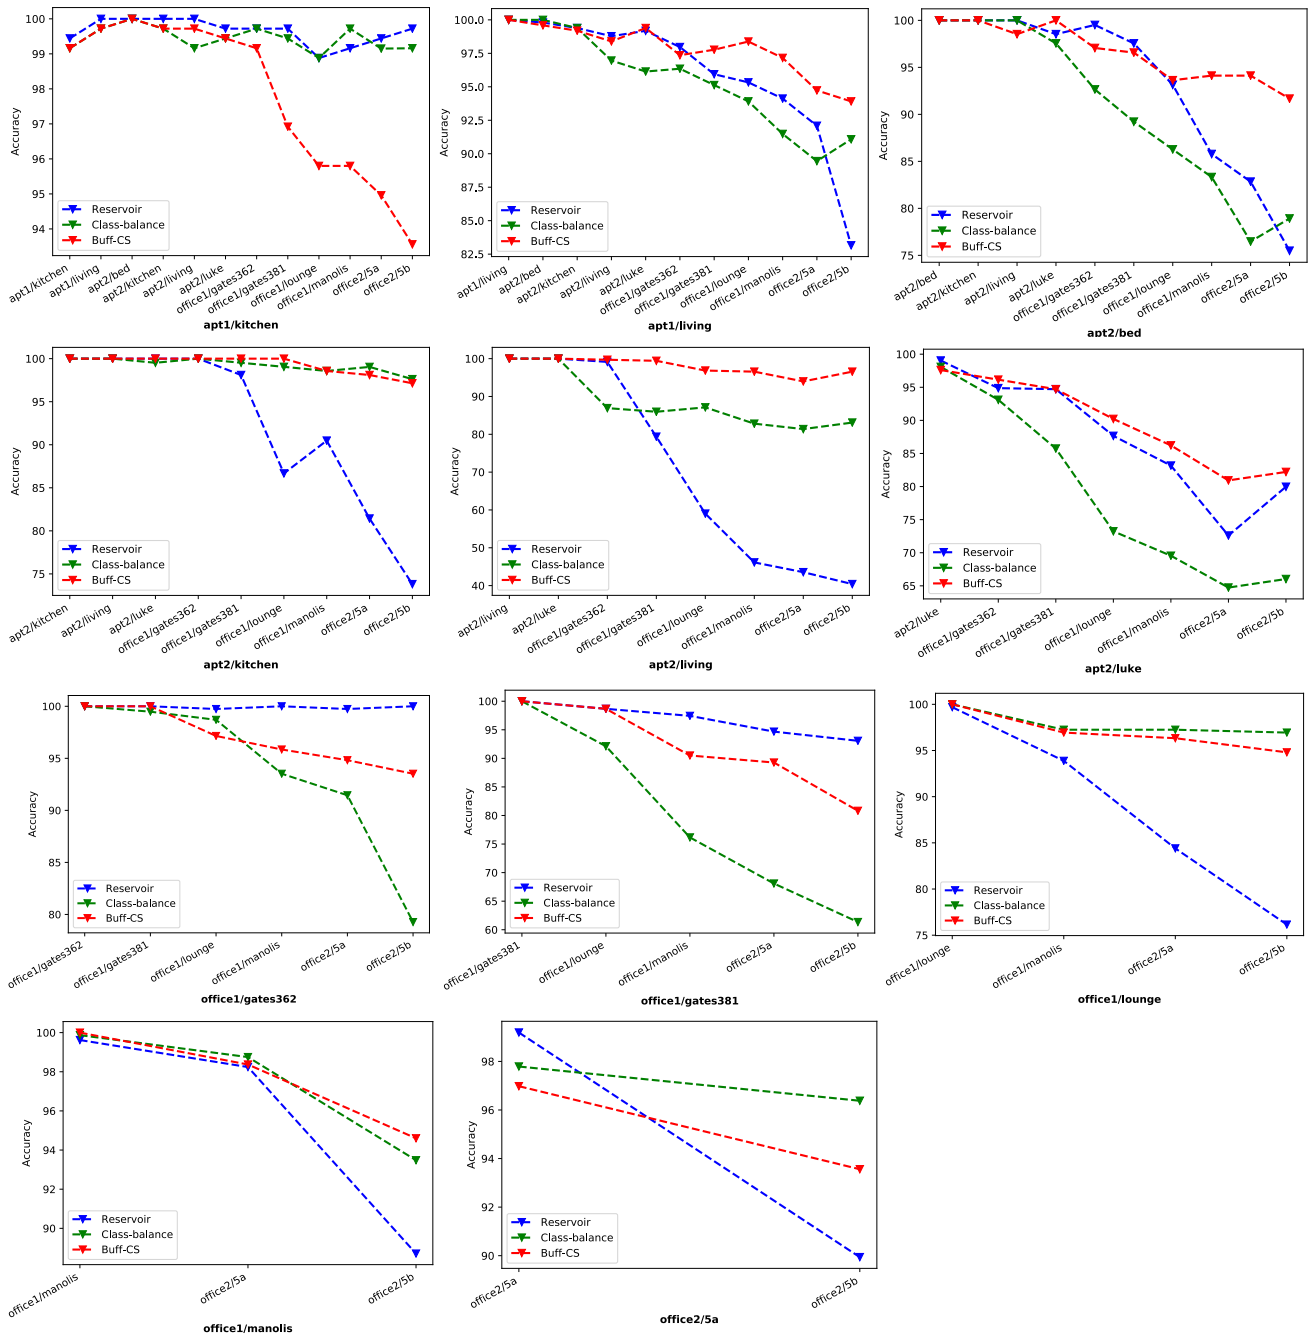

Figure 1: The accuracy (error  $< 5$  cm,  $5^\circ$ ) on individual scenes of **i12S** (except for the last scene) at each stage of the training. The x axis indicates the training progress. All methods employs an *Img-buff* buffer of size 256. The results show for majority of scenes *Buff-CS* outperforms *Class-balance* and *Reservoir*.

| Scenes           | Accuracy (%) |               |               |
|------------------|--------------|---------------|---------------|
|                  | Reservoir    | Class-balance | Buff-CS(ours) |
| apt1/kitchen     | 97.68        | <b>98.60</b>  | 93.84         |
| apt1/living      | 81.95        | 89.05         | <b>95.74</b>  |
| apt2/bed         | 74.02        | 73.53         | <b>87.25</b>  |
| apt2/kitchen     | 71.90        | 98.09         | <b>98.57</b>  |
| apt2/living      | 41.54        | 81.38         | <b>94.27</b>  |
| apt2/luke        | 80.93        | 60.10         | <b>84.54</b>  |
| office1/gates362 | <b>100</b>   | 82.38         | 91.45         |
| office1/gates381 | <b>93.44</b> | 62.77         | 76.26         |
| office1/lounge   | 71.86        | <b>96.02</b>  | 93.88         |
| office1/manolis  | 87.58        | 92.72         | <b>94.60</b>  |
| office2/5a       | 92.35        | <b>98.19</b>  | 94.97         |
| office2/5b       | <b>97.28</b> | 96.05         | 96.79         |
| <b>Average</b>   | 82.54        | 85.72         | <b>91.85</b>  |

Table 3: The percentage of accurately localized test images (error  $< 5$  cm,  $5^\circ$ ) on **i12S** with the buffer size  $B = 256$ , after the training is complete. Here we use *Img-buff* for replay. The best results are highlighted in red.

| Scenes               | Average Accuracy (%) |               |               |
|----------------------|----------------------|---------------|---------------|
|                      | Reservoir            | Class-balance | Buff-CS(ours) |
| apt1/kitchen         | <b>99.65</b>         | 99.44         | 97.83         |
| apt1/living          | 95.98                | 95.44         | <b>97.81</b>  |
| apt2/bed             | 93.28                | 90.44         | <b>96.57</b>  |
| apt2/kitchen         | 92.28                | 99.26         | <b>99.31</b>  |
| apt2/living          | 70.95                | 88.41         | <b>97.89</b>  |
| apt2/luke            | 87.43                | 78.64         | <b>89.72</b>  |
| office1/gates362     | <b>99.91</b>         | 93.74         | 96.89         |
| office1/gates381     | <b>96.77</b>         | 79.54         | 91.85         |
| office1/lounge       | 88.53                | <b>97.86</b>  | 97.02         |
| office1/manolis      | 95.52                | 97.37         | <b>97.66</b>  |
| office2/5a           | 94.57                | <b>97.09</b>  | 95.27         |
| office2/5b           | <b>99.51</b>         | 97.04         | 94.07         |
| <b>Total Average</b> | 92.83                | 92.86         | <b>95.99</b>  |

Table 4: The average accuracy over different stages of the training process on each scene of **i12S** with the buffer size  $B = 256$  and *Img-buff* replay. Our method has overall better performance compared to the other two methods.
